# Supplementary material for: Expression of collagen type 1 alpha 1 indicates lymph node metastasis and poor outcomes in squamous cell carcinomas of the lung
Source: PeerJ. 2020 Sep 29;8:e10089. doi: 10.7717/peerj.10089 (PMC7531356; doi:10.7717/peerj.10089)
Supplement: Supplemental Information 1 [file peerj-08-10089-s001.xlsx]

## Sheet: Sheet1
No.	tumor	normal	age	T	N	stage
1	120	40	61	T2a	N1	IIB
2	80	60	62	T2b	N1	IIB
3	120	90	49	T2b	N1	IIB
4	90	40	69	T2a	N0	IB
5	60	20	60	T2a	N0	IB
6	150	60	63	T3	N0	IIIA
7	120	80	72	T1a	N0	IA1
8	100	120	51	T1a	N0	IA1
9	30	40	62	T2a	N0	IB
10	180	180	60	T3	N1	IIIA
11	120	60	67	T2b	N1	IIB
12	90	60	72	T2a	N0	IB
13	160	60	48	T4	N2	IIIB
14	90	40	56	T2b	N0	IIA
15	80	40	63	T2b	N0	IIA
16	150	80	61	T4	N0	IIIA
17	210	160	64	T2a	N2	IIIA
18	110	60	72	T4	N2	IIIB
19	150	40	60	T3	N1	IIIA
20	80	50	56	T2a	N0	IB
21	180	80	63	T2a	N1	IIB
22	90	80	58	T3	N1	IIIA
23	130	40	47	T4	N2	IIIB
24	120	70	48	T2a	N1	IIB
25	110	60	56	T2a	N0	IB
26	140	40	56	T2b	N2	IIIA
27	90	80	61	T2a	N0	IB
28	150	90	54	T4	N1	IIIA
29	120	60	53	T2b	N0	IIA
30	120	130	53	T1c	N2	IIIA
31	60	50	49	T1b	N0	IA2
32	120	210	70	T1c	N0	IA3
33	240	80	54	T2a	N1	IIB
